# Supplementary material
Source: PubMed Central journal article supplement (PMC6953623)
Supplement: NIHMS1543495-supplement-1.pdf [file NIHMS1543495-supplement-1.pdf]

## Supplementary Information

### Discovery of potent and selective butyrylcholinesterase inhibitors through the use of pharmacophore-based screening

Alexander Williams<sup>a</sup>, Shuo Zhou<sup>a</sup>, Chang-Guo Zhan<sup>a,\*</sup>

<sup>a</sup> Department of Pharmaceutical Sciences, College of Pharmacy, University of Kentucky, 789 S. Limestone, Lexington, KY 40536, United States

**Table S1:** NCI compound results including SMINA scores, difference between scores, and BChE single point results.

| Compound # | Molecule                                                                                         | minimized Affinity AChE Cal/mol | minimized Affinity BCHE Cal/mol | Difference in scores | BChE Inhibition % 5 $\mu$ M |
|------------|--------------------------------------------------------------------------------------------------|---------------------------------|---------------------------------|----------------------|-----------------------------|
| 1          | 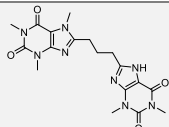<br>NSC23586    | -7.2                            | -8.7                            | 1.5                  | 25.3                        |
| 2          | <br>NSC23583   | -7.2                            | -8.8                            | 1.7                  | 15.4                        |
| 3          | <br>NSC14406  | -7.9                            | -9.0                            | 1.2                  | 19.1                        |
| 4          | <br>NSC14404  | -7.7                            | -10.2                           | 2.5                  | 17.9                        |
| 5          | <br>NSC81509  | -7.9                            | -9.6                            | 1.7                  | 25.6                        |
| 6          | <br>NSC106206 | -7.1                            | -9.7                            | 2.6                  | 62.0                        |
| 7          | <br>NSC81513  | -8.1                            | -10.1                           | 2.0                  | 25.0                        |
| 8          | <br>NSC81513  | -6.7                            | -9.8                            | 3.1                  | 26.5                        |

\* Corresponding author. Tel.: +1-859-323-3949; fax: +1-859-257-7585; e-mail: zhan@uky.edu

|    |                                                                                     |      |       |     |      |
|----|-------------------------------------------------------------------------------------|------|-------|-----|------|
|    | <b>NSC62594</b>                                                                     |      |       |     |      |
| 9  | 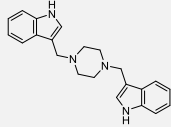   | -7.7 | -9.4  | 1.7 | 76.5 |
|    | <b>NSC42258</b>                                                                     |      |       |     |      |
| 10 |    | -8.9 | -9.5  | 0.6 | 73.1 |
|    | <b>NSC135823</b>                                                                    |      |       |     |      |
| 11 |    | -7.5 | -8.8  | 1.3 | 16.7 |
|    | <b>NSC128762</b>                                                                    |      |       |     |      |
| 12 |    | -8.7 | -9.2  | 0.5 | 4.0  |
|    | <b>NSC114753</b>                                                                    |      |       |     |      |
| 13 |    | -8.2 | -9.3  | 1.1 | 8.0  |
|    | <b>NSC106218</b>                                                                    |      |       |     |      |
| 14 |   | -7.2 | -8.7  | 1.5 | 43.2 |
|    | <b>NSC277493</b>                                                                    |      |       |     |      |
| 15 |  | -7.0 | -9.3  | 2.3 | 81.2 |
|    | <b>NSC191952</b>                                                                    |      |       |     |      |
| 16 |  | -9.8 | -11.0 | 1.1 | 99.7 |
|    | <b>NSC164952</b>                                                                    |      |       |     |      |
| 17 |  | -9.4 | -10.9 | 1.5 | 97.5 |
|    | <b>NSC164949</b>                                                                    |      |       |     |      |
| 18 |  | -9.8 | -11.2 | 1.4 | 75.0 |
|    | <b>NSC136692</b>                                                                    |      |       |     |      |
| 19 |  | -7.9 | -11.5 | 3.6 | 48.5 |

|    |                                                                                     |      |       |     |       |
|----|-------------------------------------------------------------------------------------|------|-------|-----|-------|
|    | <b>NSC353730</b>                                                                    |      |       |     |       |
| 20 | 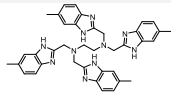   | -9.1 | -11.9 | 2.8 | 41.7  |
|    | <b>NSC348884</b>                                                                    |      |       |     |       |
| 21 |    | -8.9 | -11.7 | 2.8 | 92.0  |
|    | <b>NSC344032</b>                                                                    |      |       |     |       |
| 22 |    | -7.8 | -9.2  | 1.4 | 43.2  |
|    | <b>NSC335305</b>                                                                    |      |       |     |       |
| 23 |    | -8.7 | -10.3 | 1.6 | 65.7  |
|    | <b>NSC731399</b>                                                                    |      |       |     |       |
| 24 |   | -7.6 | -8.8  | 1.2 | 55.6  |
|    | <b>NSC734041</b>                                                                    |      |       |     |       |
| 25 |  | -7.5 | -10.2 | 2.7 | -30.9 |
|    | <b>NSC704343</b>                                                                    |      |       |     |       |
| 26 |  | -7.7 | -9.2  | 1.5 | 9.9   |
|    | <b>NSC704342</b>                                                                    |      |       |     |       |
| 27 |  | -7.9 | -10.1 | 2.1 | 20.7  |
|    | <b>NSC702402</b>                                                                    |      |       |     |       |
| 28 |  | -6.4 | -9.6  | 3.3 | 47.5  |
|    | <b>NSC635324</b>                                                                    |      |       |     |       |
| 29 |  | -8.1 | -9.1  | 1.0 | 92.9  |
|    | <b>NSC627875</b>                                                                    |      |       |     |       |

|    |                                                                                     |      |       |     |       |
|----|-------------------------------------------------------------------------------------|------|-------|-----|-------|
| 30 | 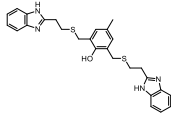   | -7.7 | -9.7  | 2.0 | 101.2 |
|    | <b>NSC620023</b>                                                                    |      |       |     |       |
| 31 |    | -7.3 | -8.8  | 1.5 | 32.7  |
|    | <b>NSC618680</b>                                                                    |      |       |     |       |
| 32 |    | -7.9 | -10.6 | 2.7 | 38.9  |
|    | <b>NSC616635</b>                                                                    |      |       |     |       |
| 33 |    | -7.6 | -9.4  | 1.8 | 79.9  |
|    | <b>NSC668429</b>                                                                    |      |       |     |       |
| 34 |    | -7.6 | -10.5 | 3.0 | -11.4 |
|    | <b>NSC658713</b>                                                                    |      |       |     |       |
| 35 |    | -7.2 | -9.4  | 2.2 | 62.7  |
|    | <b>NSC650830</b>                                                                    |      |       |     |       |
| 36 |  | -6.8 | -9.0  | 2.2 | 43.5  |
|    | <b>NSC648596</b>                                                                    |      |       |     |       |
| 37 |  | -8.6 | -9.0  | 0.4 | 50.3  |
|    | <b>NSC696907</b>                                                                    |      |       |     |       |
| 38 |  | -7.1 | -9.4  | 2.2 | 50.9  |
|    | <b>NSC681175</b>                                                                    |      |       |     |       |
| 39 |  | -7.1 | -9.3  | 2.2 | 48.5  |
|    | <b>NSC681174</b>                                                                    |      |       |     |       |
| 40 |  | -7.3 | -10.3 | 2.9 | 51.2  |
|    | <b>NSC668434</b>                                                                    |      |       |     |       |
| 41 |  | -6.6 | -10.3 | 3.6 | 46.0  |
|    | <b>NSC668432</b>                                                                    |      |       |     |       |

# NMR Spectra of top compounds for structure confirmation and purity analysis

## Figure S1. NSC164949

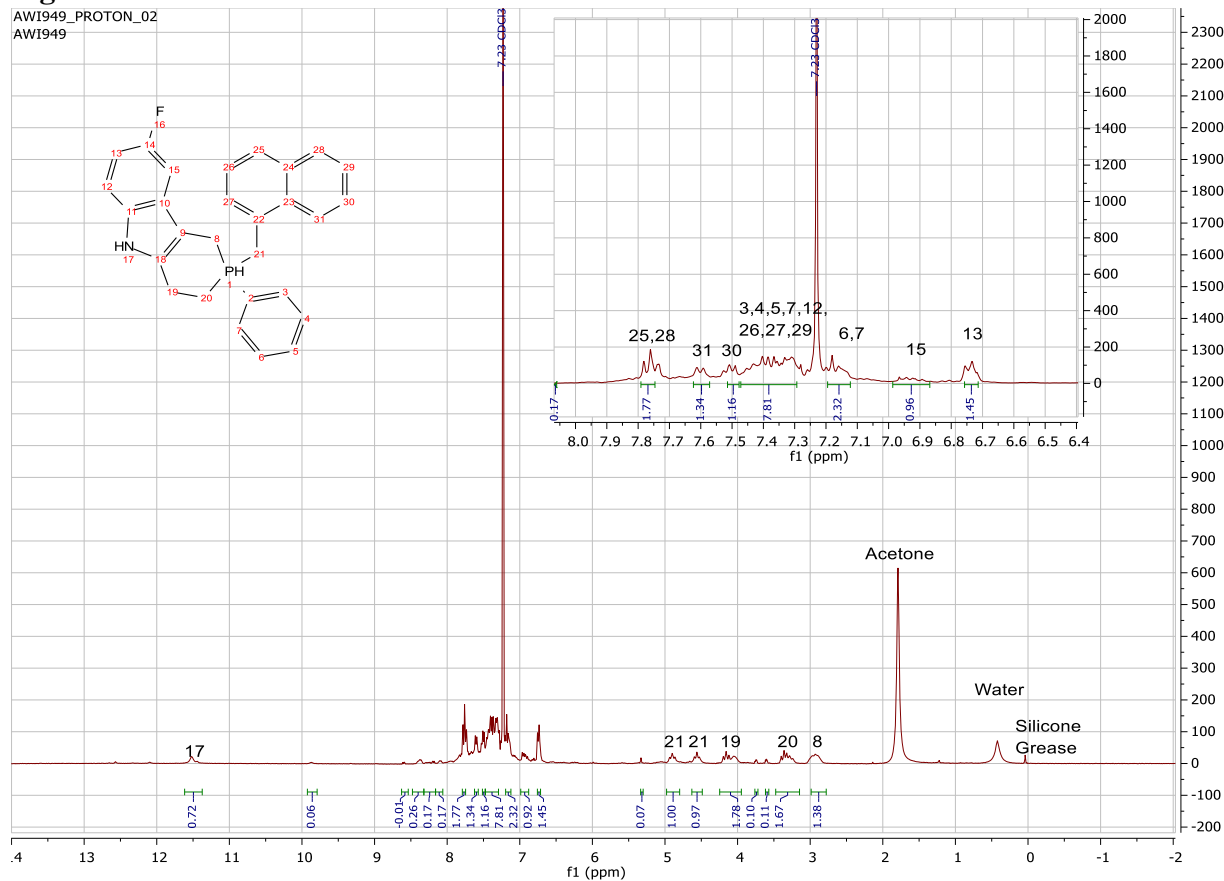

$$\frac{24.25 \text{ Integral Compound}}{25.26 \text{ Integral Total}} = 96\% \text{ Purity}$$

Figure S2. NSC620023

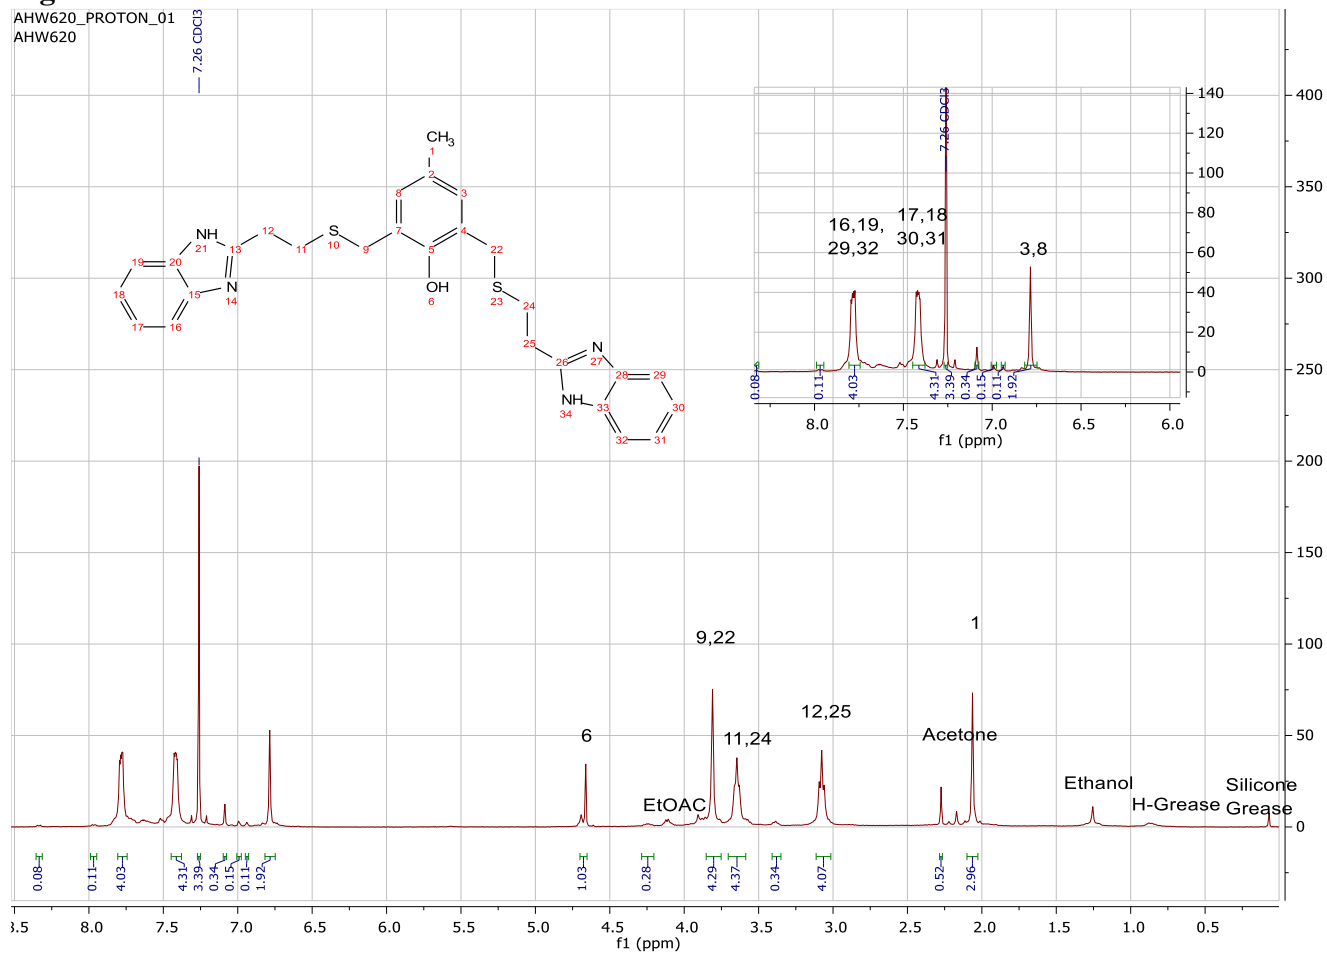

$$\frac{29.34 \text{ Integral Compound}}{31.27 \text{ Integral Total}} = 94\% \text{ Purity}$$

Figure S3. NSC164952

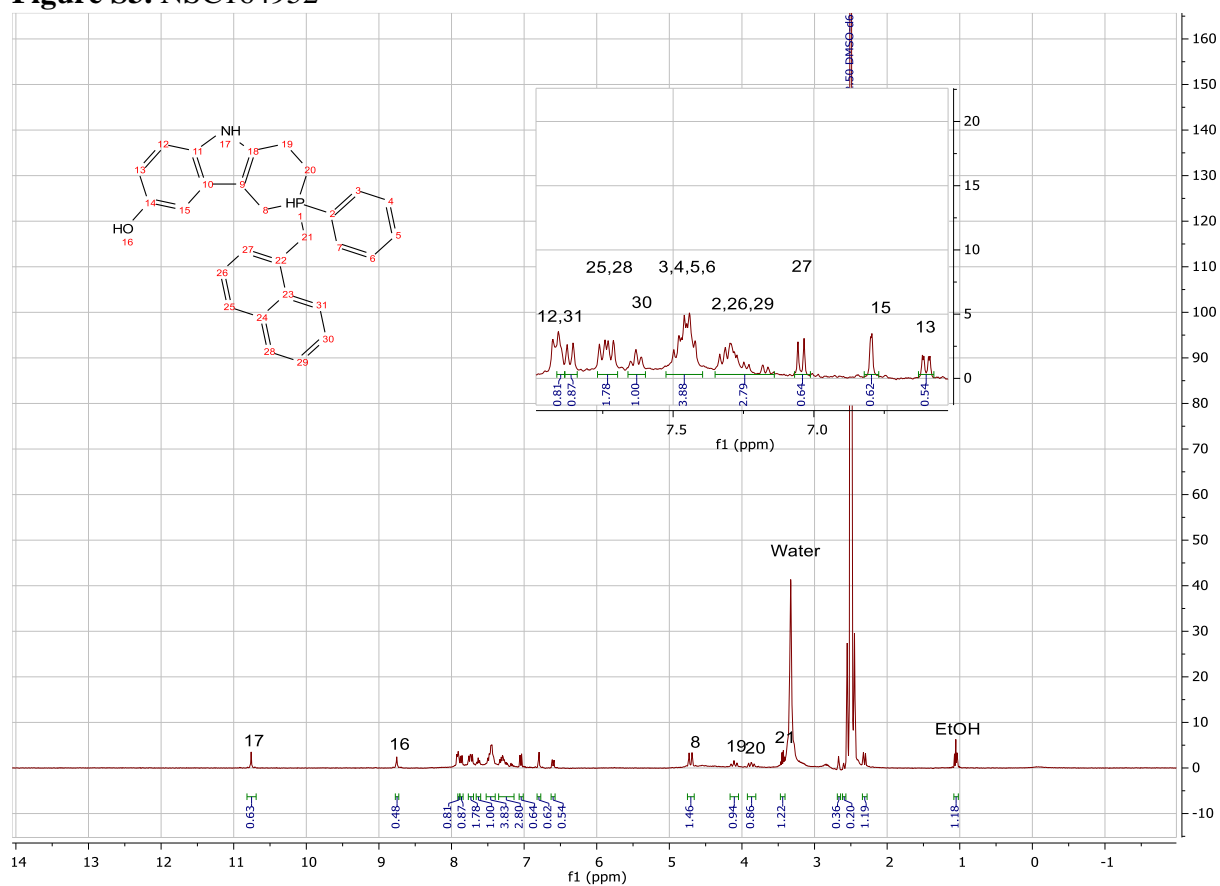

$$\frac{19.19 \text{ Integral Compound}}{21.27 \text{ Integral Total}} = 90\% \text{ Purity}$$
